# Supplementary material for: Patient factors associated with conveyance decision-making by Emergency Medical Services professionals in patients with a syncope: a cross-sectional factorial survey design
Source: PubMed Central journal article supplement (PMC10557231; doi:10.1186/s12873-023-00890-y), 2023-10-05
Supplement: 12873_2023_890_MOESM2_ESM.pdf [file 12873_2023_890_MOESM2_ESM.pdf]

## Additional file 2: Translation of the National Protocol Ambulance Care (LPA) 8.1

### Protocol 4.5 – Transient loss of consciousness (syncope)

#### 4.5

#### Transient loss of consciousness (syncope)

Sudden transient loss of consciousness  
with rapid spontaneous full recovery

##### History of the event

- Triggering factor(s)\*
- Prodromal symptoms \*\*
- Briefly unconscious
- Clear consciousness immediately after transient loss of consciousness
- No complaints within 15 minutes

##### Rule-out

- ECG: ischemia, rhythm/conduction disorders
- Syncope during exercise
- Neurological symptoms/abnormalities
- Blood glucose level < 3,5 mmol/l
- Red flags \*\*\*

##### \* Triggering factors

- Emotional stimulus, fear, pain
- Prolonged standing in crowded, hot environment

##### \*\* Prodromal symptoms

- Light headedness/dizziness
- Nausea, paleness, sweating
- Visual disturbances

##### \*\*\* Red flags

- Sudden cardiac death < 40 years of age, in family history
- 1<sup>st</sup> episode > 35 years of age
- Medical history: cardiovascular abnormalities, pulmonary embolism, pulmonary hypertension
